# Supplementary material for: A simple prediction model to estimate obstructive coronary artery disease
Source: Springer Nature journal article supplement (doi:10.1186/s12872-018-0745-0), 2018-01-16
Supplement: MOESM1 [file 15368578]

All patients undergoing coronary angiography (CAG) or PCI (2010 - 2012) (N=3237)

Excluded(n=1957)

CABG (n=27)

Previous PCI or Previous MI (n=345) ;

Acute MI or Emergent PCI (1112)

Lack data of one of Framingham traditional risk variables (age, gender, CHO, HLD-C, SBP, DBP, smoke) (545)

Lack complete data of CAG (304)

Included study population (n=1262)

With reliable Framingham risk variables and CAG data, in the cohort without known CAD referred for elective CAG

The primary endpoint :

obstructive coronary artery disease (OCAD) was defined as  $\geq 50\%$  stenosis in at least 1 major coronary vessel according to CAG.
